# Supplementary material for: Fibulin2: a negative regulator of BMSC osteogenic differentiation in infected bone fracture healing
Source: Springer Nature journal article supplement (doi:10.1038/s12276-023-00942-0), 2023-02-17
Supplement: MOESM1 [file 12276_2023_942_MOESM1_ESM.pdf]

## Supplementary figure titles and tables

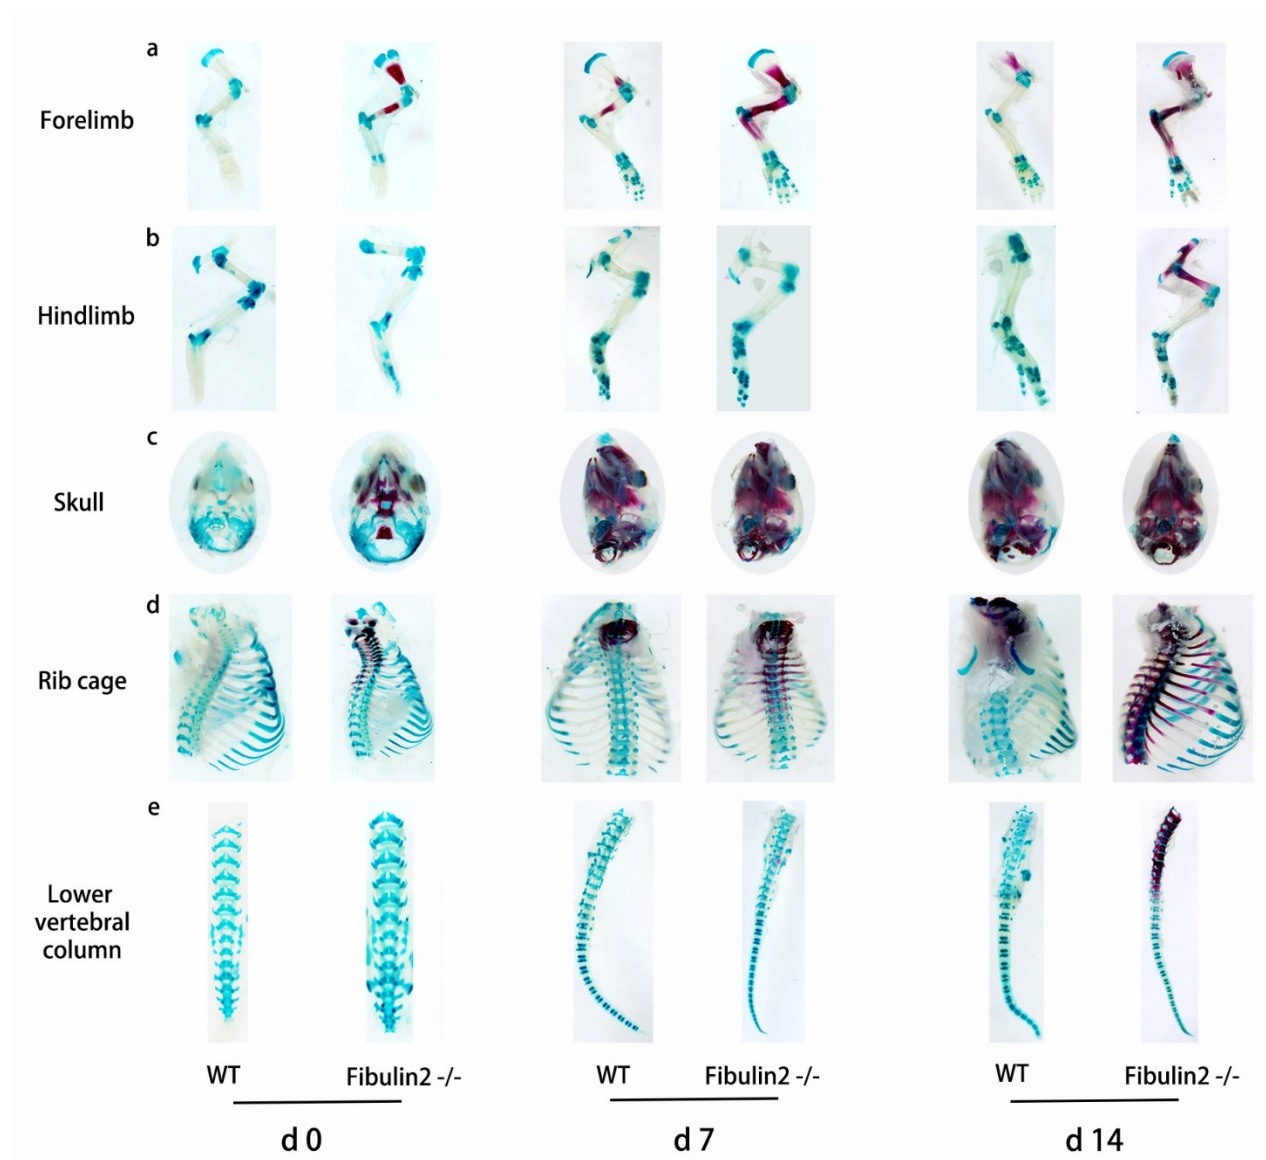

**Supplementary Fig. 1 Accelerated bone formation in Fibulin2 knockout mice.** Fibulin2 knockout (KO) neonatal mice and wild-type (WT) mice from the same litter were subjected to whole skeletal tissue staining with alizarin red and Alcian blue on days 0, 7 and 14. The mineralized bone was stained red, and the cartilage was stained blue. **a, b, c, d, e** Partially enlarged diagrams of

mouse structures. The forelimbs (a), skull bone (c) and rib cage (d) appeared to be mineralized in the *Fibulin2*<sup>-/-</sup> mice on days 0, 7 and 14. The mineralization rate in the hindlimbs (b) and lower vertebral column (e) was obviously higher in the *Fibulin2*<sup>-/-</sup> neonatal mouse than in the WT mice on day 14.

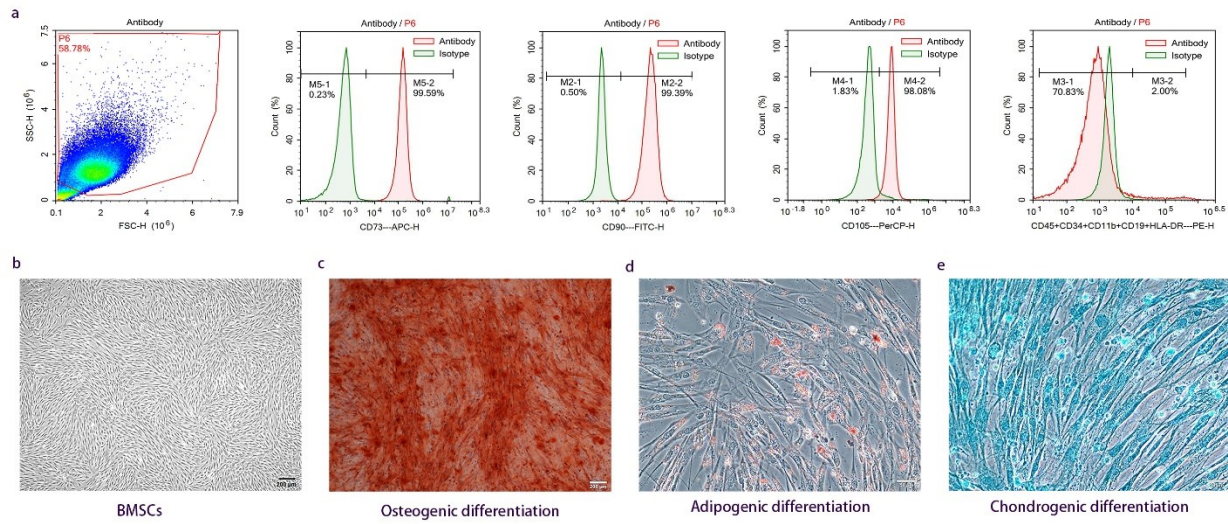

**Supplementary Fig. 2 Identification of isolated BMSCs.** **a** Flow cytometry results showed that BMSCs expressed CD105, CD90 and CD73 but not CD45, CD34, CD11b, CD19 or HLA-DR. **b** BMSCs showed plasticity in their adherence and were spindle-shaped. **c, d, e** Osteogenic, adipogenic and chondrogenic differentiation assays demonstrated that the isolated BMSCs exhibited multidifferentiation potential.

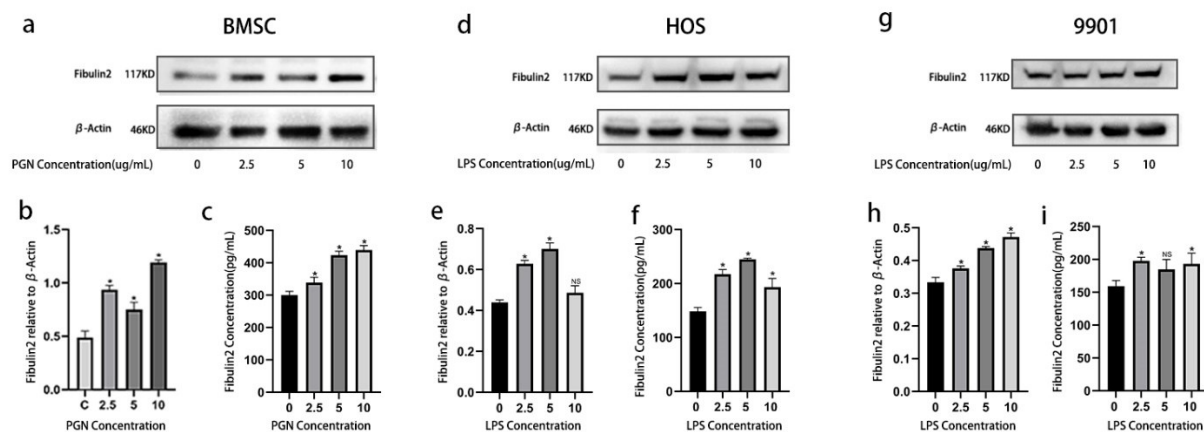

**Supplementary Fig. 3 Fibulin2 expression in MSC-osteoblast lineage cells.** **a** Fibulin2 expression in BMSCs stimulated with PGN for 24 h was detected by western blotting (WB). **b** Quantification of the WB data (\*  $P < 0.05$ , compared to the control,  $n=3$ ). **c** Fibulin2 expression in BMSCs stimulated with PGN for 24 h was detected by ELISA (\*  $P < 0.05$ , compared to the control,  $n=3$ ). **d** Fibulin2 expression in HOS cells stimulated with PGN for 24 h was detected by WB. **e** Quantification of the WB data (\*  $P < 0.05$ , compared to the control; NS, not significant;  $n=3$ ). **f** Fibulin2 expression in HOS cells stimulated with PGN for 24 h was detected by ELISA (\*  $P < 0.05$  compared to the control,  $n=3$ ). **g** Fibulin2 expression in 9901 cells stimulated with PGN for 24 h was detected by WB. **h** Quantification of the WB data (\*  $P < 0.05$ , compared to the control,  $n=3$ ). **i** Fibulin2 expression in 9901 cells stimulated with PGN for 24 h was detected by ELISA (\*  $P < 0.05$ , compared to the control; NS, not significant;  $n=3$ ).

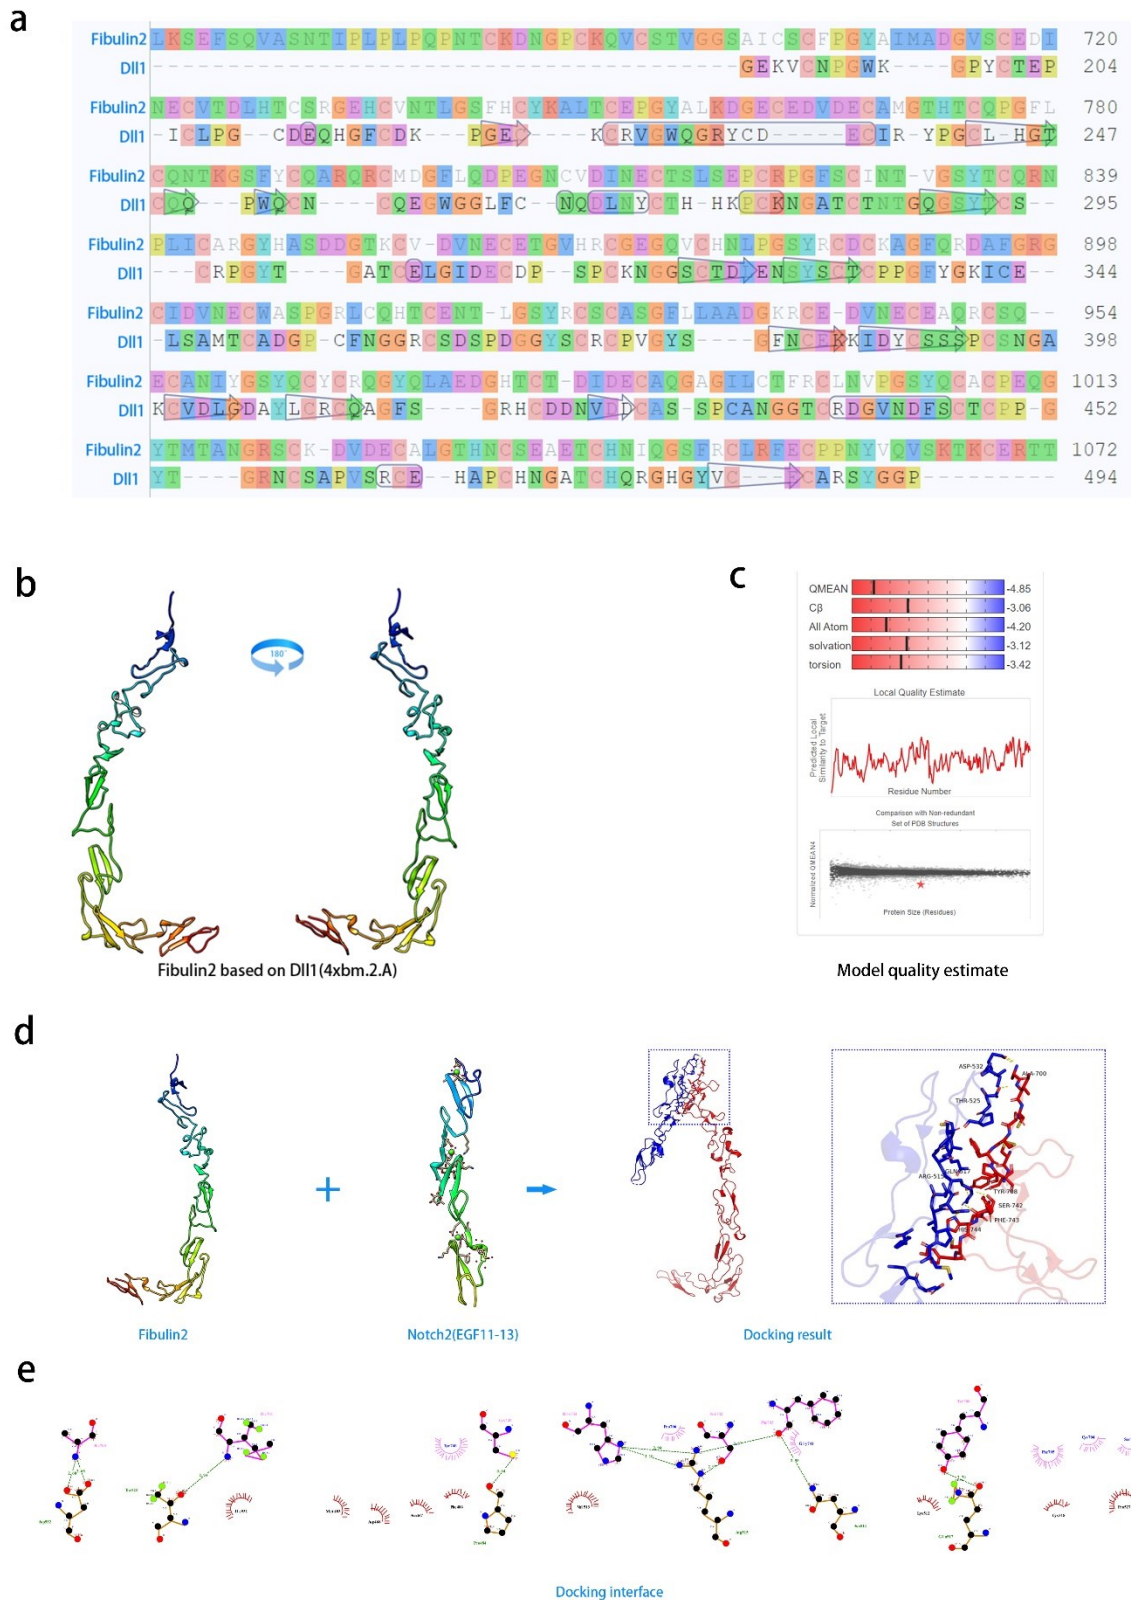

**Supplementary Fig. 4 Docking between Fibulin2 and Notch2.** **a** The sequence identity between Fibulin2 and DII1 was 31.44%. **b** The spatial structure of Fibulin2, as determined by the DII1



(4xbm.2.A) structure, was found to be L-shaped. **c** Structure quality assessment of Fibulin2. **d** The initial docking between the Fibulin2 and Notch2 structures. The docking complex was found to be J-shaped or hook-shaped. The magnified docking interface is shown in the right circled area. **e** Interacting molecules and modes of interaction related to the docking results.

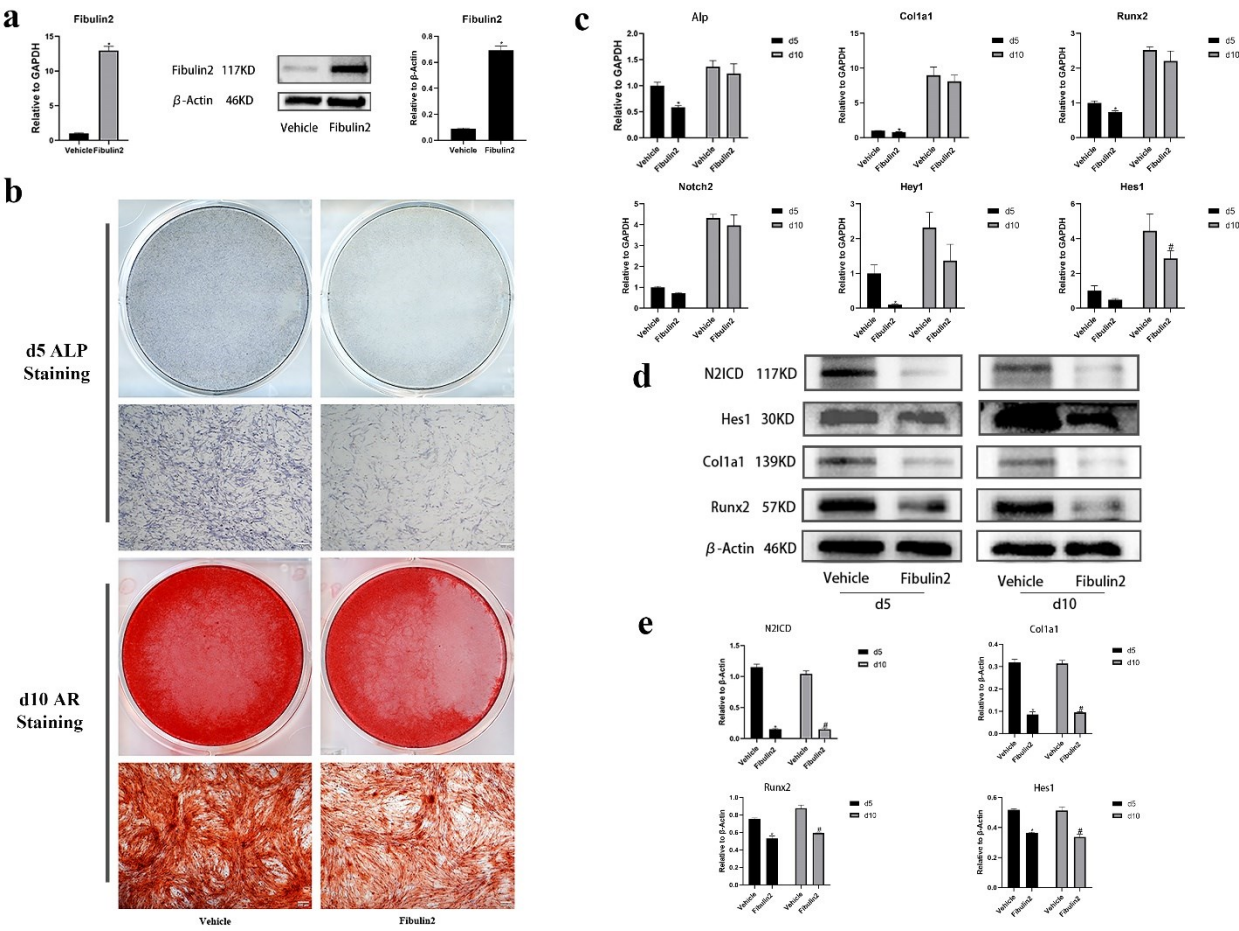

**Supplementary Fig. 5 Overexpression of Fibulin2 inhibits BMSC osteogenesis by blocking Notch2 pathway activation.** **a** Fibulin2 expression in BMSCs was analysed by RT-qPCR and western blotting (WB). Fibulin2 expression was highly upregulated in Lv-Fibulin2-infected cells compared with vehicle-infected cells (\* $P < 0.05$ ). **b** ALP staining and ARS on days 5 and 10 revealed

lower ALP activity and fewer mineralization nodes in the Fibulin2 group than in the vehicle group.

**c** The expression of osteogenesis markers (ALP, Colla1, and Runx2) and Notch2 pathway components (Notch2, Hey1, and Hes1) was detected by RT-qPCR. Overexpression of Fibulin2 inhibited the transcription of Alp, Colla1, Runx2, Hey1, and Hes1 to varying degrees (\*Fibulin2 group vs. vehicle group,  $P<0.05$  on day 5; #Fibulin2 group vs. vehicle group,  $P<0.05$  on day 10;  $n=3$ ). **d** WB showed decreased expression of N2ICD, Hes1, Colla1 and Runx2 in the Fibulin2 group. **e** Quantification of the WB data (\*Fibulin2 vs. vehicle group,  $P<0.05$  on day 5; #Fibulin2 group vs. vehicle group,  $P<0.05$  on day 10;  $n=3$ ).

Supplementary Table 1 Clinical information of the volunteers

| Patient ID | Sex    | Age | Diagnosis                      | Health history         | Surgery             | Specimen    | Application of specimen | Group                        |
|------------|--------|-----|--------------------------------|------------------------|---------------------|-------------|-------------------------|------------------------------|
| 1          | male   | 55  | ONFH                           | no                     | THR                 |             |                         | control                      |
| 2          | female | 52  | fracture                       | hypertension           | ORIF                |             |                         | control                      |
| 3          | female | 50  | ONFH                           | no                     | THR                 |             |                         | control                      |
| 4          | male   | 53  | fracture                       | no                     | ORIF                |             |                         | control                      |
| 5          | male   | 45  | osteomyelitis                  | no                     | debridement         |             |                         | osteomyelitis                |
| 6          | female | 34  | osteomyelitis                  | no                     | debridement         |             |                         | osteomyelitis                |
| 7          | female | 63  | osteomyelitis                  | penicillin anaphylaxis | debridement         |             |                         | osteomyelitis                |
| 8          | male   | 51  | After debridement of infection | no                     | Masquelet technique | bone        | Proteomic studies       | recovered from osteomyelitis |
| 9          | male   | 44  | After debridement of infection | no                     | Masquelet technique |             |                         | recovered from osteomyelitis |
| 10         | female | 50  | After debridement of infection | no                     | Masquelet technique |             |                         | recovered from osteomyelitis |
| 11         | male   | 35  | ONFH                           | no                     | THR                 |             |                         |                              |
| 12         | female | 40  | ONFH                           | no                     | THR                 | bone marrow | Isolation of BMSCs      | /                            |
| 13         | female | 44  | ONFH                           | no                     | THR                 |             |                         |                              |
| 14         | male   | 61  | osteomyelitis                  | diabetes               | amputation          | bone        |                         | control and osteomyelitis    |

|    |        |    |               |    |             |                                       |               |
|----|--------|----|---------------|----|-------------|---------------------------------------|---------------|
| 15 | male   | 55 | ONFH          | no | THR         | Histology and<br>Immunohistochemistry | control       |
| 16 | male   | 68 | ONFH          | no | THR         |                                       |               |
| 17 | female | 71 | osteomyelitis | no | debridement | experiment                            | osteomyelitis |
| 18 | female | 67 | osteomyelitis | no | debridement |                                       |               |

---

Note: ONFH: osteonecrosis of the femoral head; THR: total hip arthroplasty; ORIF: open reduction and internal fixation.
